# Supplementary material for: The weather@home regional climate modelling project for Australia and New Zealand
Source: Copernicus journal article supplement (doi:10.5194/gmd-9-3161-2016), 2016-09-15
Supplement: Supplementary file 1 [file gmd-9-3161-2016-supplement.pdf]

Supplement of Geosci. Model Dev., 9, 3161–3176, 2016  
<http://www.geosci-model-dev.net/9/3161/2016/>  
doi:10.5194/gmd-9-3161-2016-supplement  
© Author(s) 2016. CC Attribution 3.0 License.

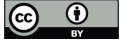

*Supplement of*

## **The weather@home regional climate modelling project for Australia and New Zealand**

**Mitchell T. Black et al.**

*Correspondence to:* Mitchell T. Black ([mtblack@student.unimelb.edu.au](mailto:mtblack@student.unimelb.edu.au))

The copyright of individual parts of the supplement might differ from the CC-BY 3.0 licence.

# <sup>1</sup> **Supplementary Material**

## <sup>2</sup> **Model output variables**

<sup>3</sup> The weather@home Australia-New Zealand project outputs a number of variables  
<sup>4</sup> on the global (HadAM3P) and regional (HadRM3P) model domains. An overview  
<sup>5</sup> of the model output is provided in Table S1.

Table S1: Output variables from the weather@home global model (HadAM3P) and nested regional model (HadRM3P).

| <b>Variable</b>                                     | <b>HadAM3P<br/>monthly mean<br/>(height)</b> | <b>HadRM3P<br/>monthly mean<br/>(height)</b> | <b>HadRM3P daily<br/>mean (height)</b> |
|-----------------------------------------------------|----------------------------------------------|----------------------------------------------|----------------------------------------|
| Surface net downward shortwave flux (W m-2)         | surface                                      | surface                                      |                                        |
| Outgoing shortwave flux (W m-2)                     | top of atmosphere                            | top of atmosphere                            |                                        |
| Outgoing shortwave flux assuming clear sky (W m-2)  | top of atmosphere                            | top of atmosphere                            |                                        |
| Surface net downward longwave flux (W m-2)          | surface                                      | surface                                      |                                        |
| Net upward longwave flux (W m-2)                    | top of atmosphere                            | top of atmosphere                            |                                        |
| Net upward longwave flux assuming clear sky (W m-2) | top of atmosphere                            | top of atmosphere                            |                                        |
| Surface upward sensible heat flux (W m-2)           | surface                                      | surface                                      |                                        |
| Eastward wind (m s-1)                               | 10 m, 850 hPa, 500 hPa, 200 hPa              | 10 m, 850 hPa, 500 hPa, 200 hPa              |                                        |
| Northward wind (m s-1)                              | 10 m, 850 hPa, 500 hPa, 200 hPa              | 10 m, 850 hPa, 500 hPa, 200 hPa              |                                        |
| Windspeed (m s-1)                                   |                                              |                                              | 10 m (land only)                       |
| Surface upward latent heat flux                     | surface                                      | surface                                      |                                        |
| Maximum air temperature (K)                         | 1.5 m                                        | 1.5 m                                        | 1.5 m (land only)                      |
| Minimum air temperature (K)                         | 1.5 m                                        | 1.5 m                                        | 1.5 m (land only)                      |
| Mean air temperature (K)                            | 500 hPa                                      | 500 hPa                                      |                                        |
| Relative humidity (%)                               | 1.5 m, 500 hPa                               | 1.5 m, 500 hPa                               | 1.5 m (land only)                      |
| Dew point temperature (K)                           | 1.5 m                                        | 1.5 m                                        |                                        |
| Precipitation flux (kg m-2 s-1)                     | surface                                      | surface                                      | surface                                |
| Liquid water content of soil layer (kg m-2)         | surface                                      | surface                                      |                                        |
| Geopotential height (m)                             | 500 hPa                                      | 500 hPa                                      |                                        |
| Air pressure at sea level (Pa)                      | surface                                      | surface                                      | surface                                |
| Surface temperature (K)                             | surface                                      | surface                                      |                                        |

## 1 Constructing counterfactual climate scenarios

2 This study constructs ten possible representations of hypothetical “natural” climates  
3 without the effect of human influences. These are constructed using CMIP5 models,  
4 as outlined in Table S2.

Table S2: CMIP5 models used for estimating patterns of SST warming due to anthropogenic emissions.

| <b>Model</b> | <b>Ensemble members</b>                        |
|--------------|------------------------------------------------|
| CCSM4        | r1i1p1, r2i1p1, r4i1p1, r6i1p1                 |
| CNRM-CM5     | r1i1p1, r2i1p1, r3i1p1, r4i1p1, r5i1p1, r8i1p1 |
| CanESM2      | r1i1p1, r2i1p1, r3i1p1, r4i1p1, r5i1p1         |
| GFDL-CM3     | r1i1p1, r3i1p1, r5i1p1                         |
| GISS-E2-H    | r1i1p1, r2i1p1, r3i1p1, r4i1p1, r5i1p1         |
| GISS-E2-R    | r1i1p1, r2i1p1, r3i1p1, r4i1p1, r5i1p1         |
| HadGEM2-ES   | r1i1p1, r2i1p1, r3i1p1, r4i1p1                 |
| IPSL-CM5A-LR | r1i1p1, r2i1p1, r3i1p1                         |
| IPSL-CM5A-MR | r1i1p1, r2i1p1, r3i1p1                         |
| MIROC-ESM    | r1i1p1, r2i1p1, r3i1p1                         |

## 1 Model evaluation

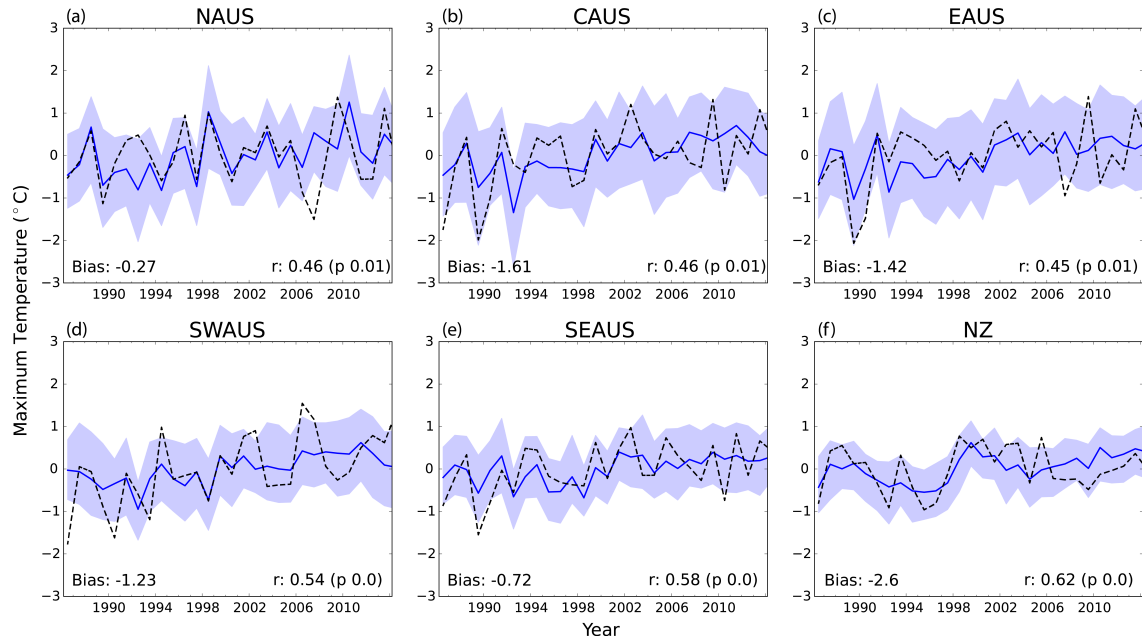

Figure S1: Time series of wintertime (June–August) average maximum temperature for the respective study regions (as labelled) for 1986–2014. Values from weather@home simulations are shown by the solid line (5th–95th percentile shaded envelope) while the observations (AWAP over Australia and VCSN over New Zealand) are shown by the dashed line. The time series are given as anomalies relative to the mean of the entire period. The bias between the model and observations is indicated, along with the Pearson correlation coefficient ( $r$ ) and p-value for testing non-correlation.

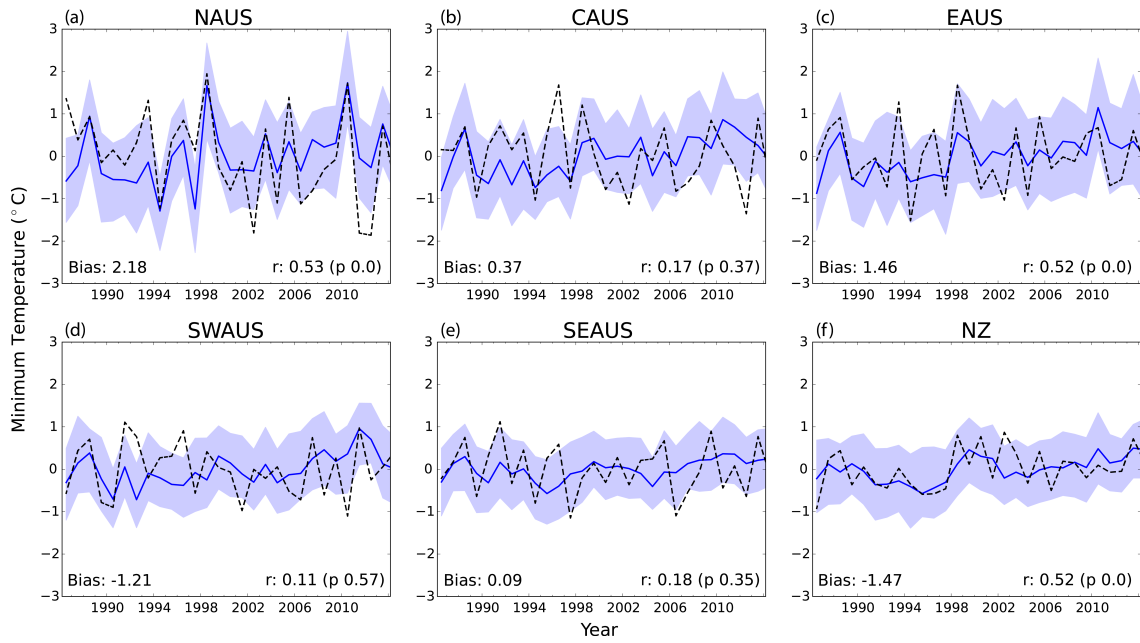

Figure S2: As in Figure S1, but showing average minimum temperature.

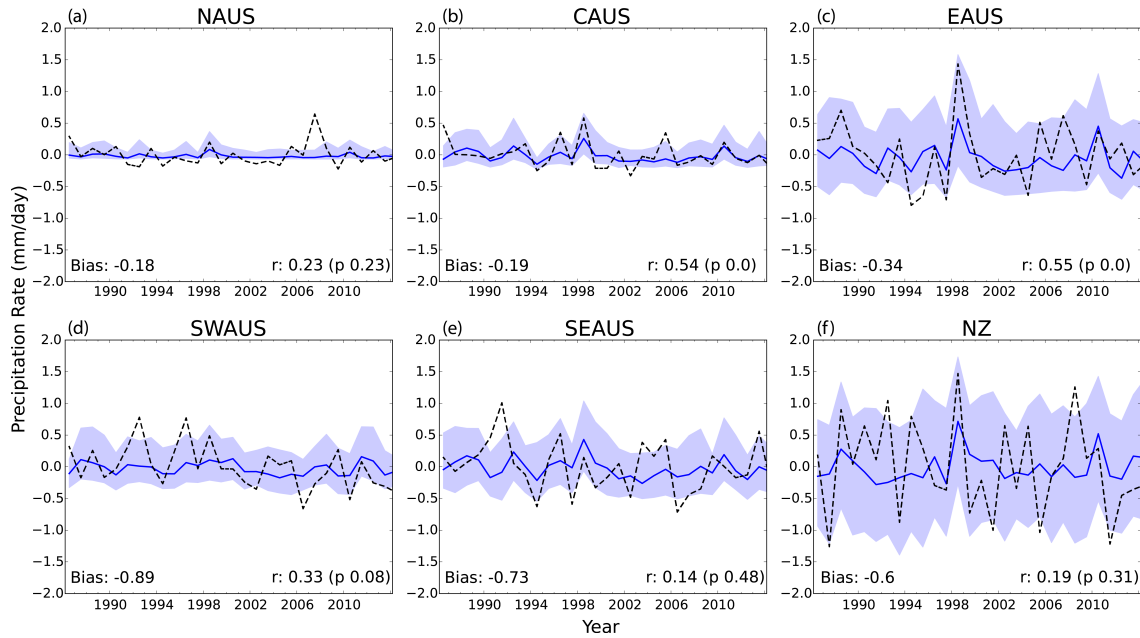

Figure S3: As in Figure S1, but showing average precipitation.

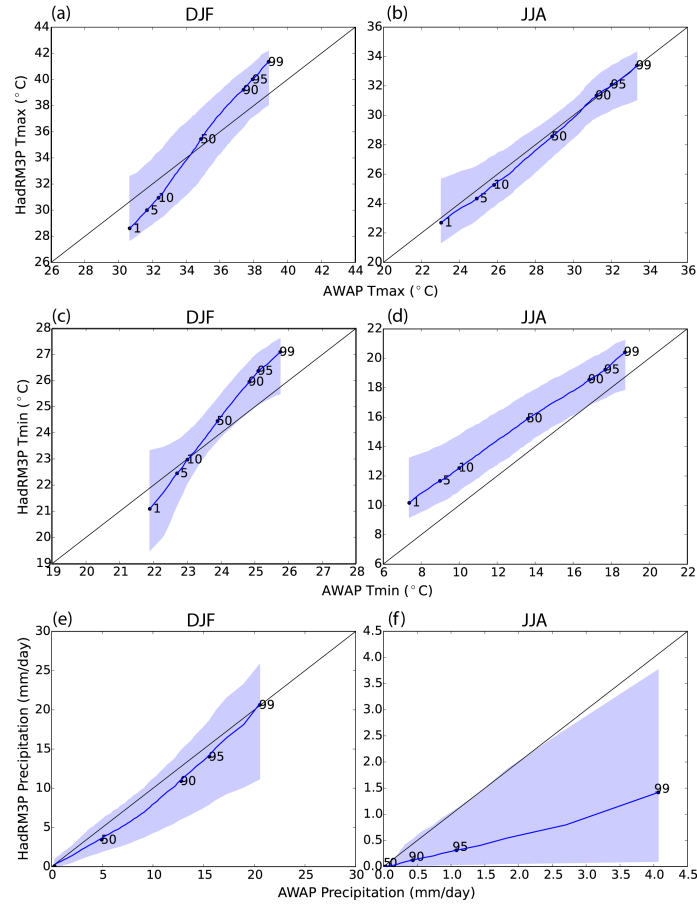

Figure S4: Quantile-quantile plots showing distributions of daily maximum temperature (a, b), minimum temperature (c, d) and precipitation (e, f), averaged over northern Australia. Distributions are shown for December–February (a,c,e) and June–August (b, d, f). The solid blue line shows the percentile values for the entire ensemble of model simulations, while the blue envelope shows the 5th to 95th percentile range of values for individual ensemble members.

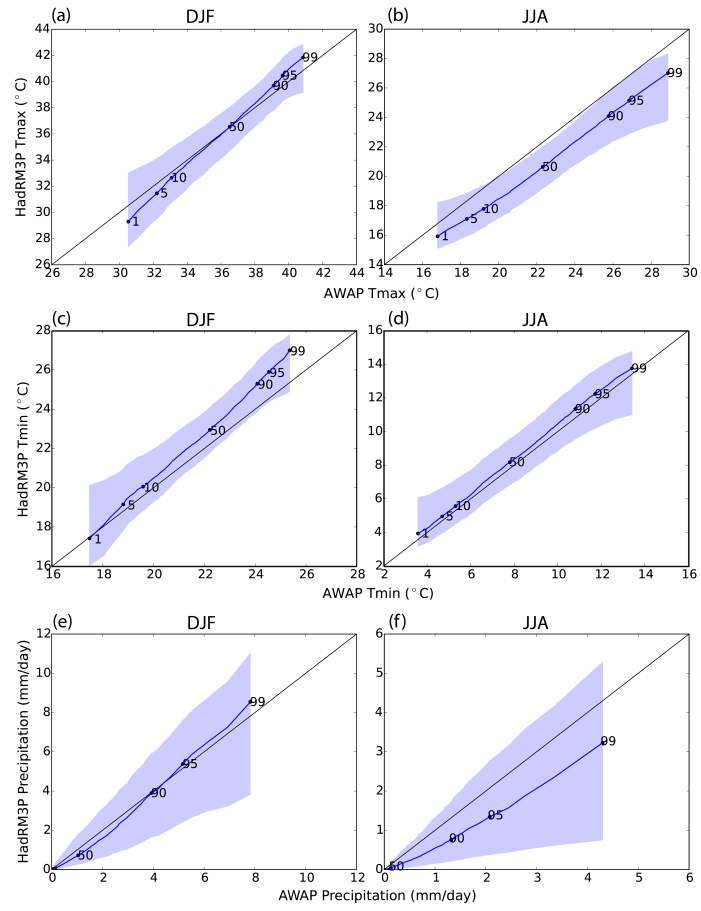

Figure S5: As in Figure S4, but for central Australia.



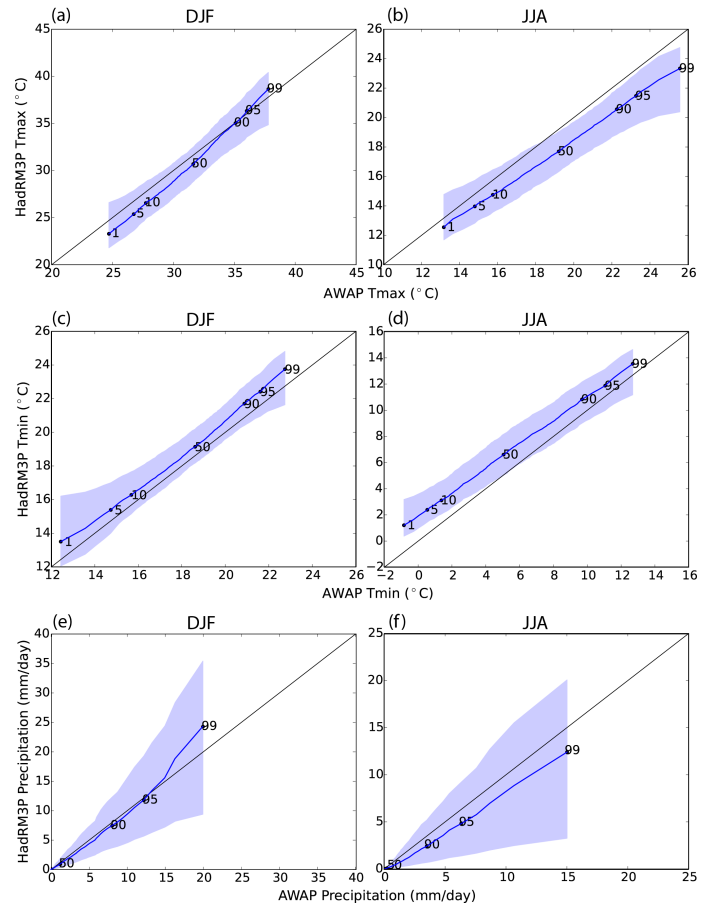

Figure S6: As in Figure S4, but for eastern Australia.

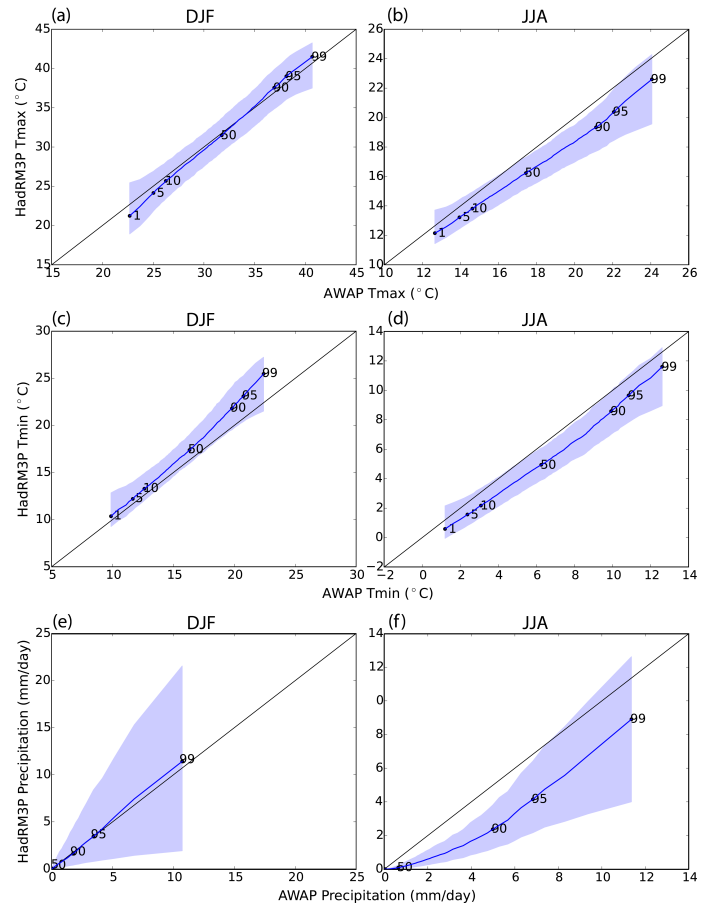

Figure S7: As in Figure S4, but for southwest Australia.

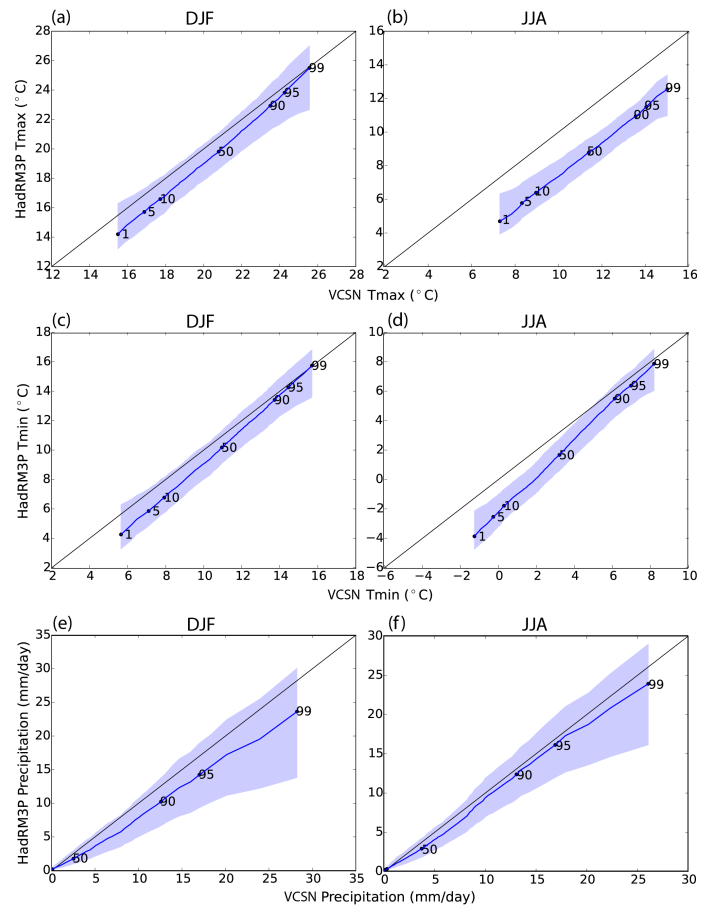

Figure S8: As in Figure S4, but for New Zealand.

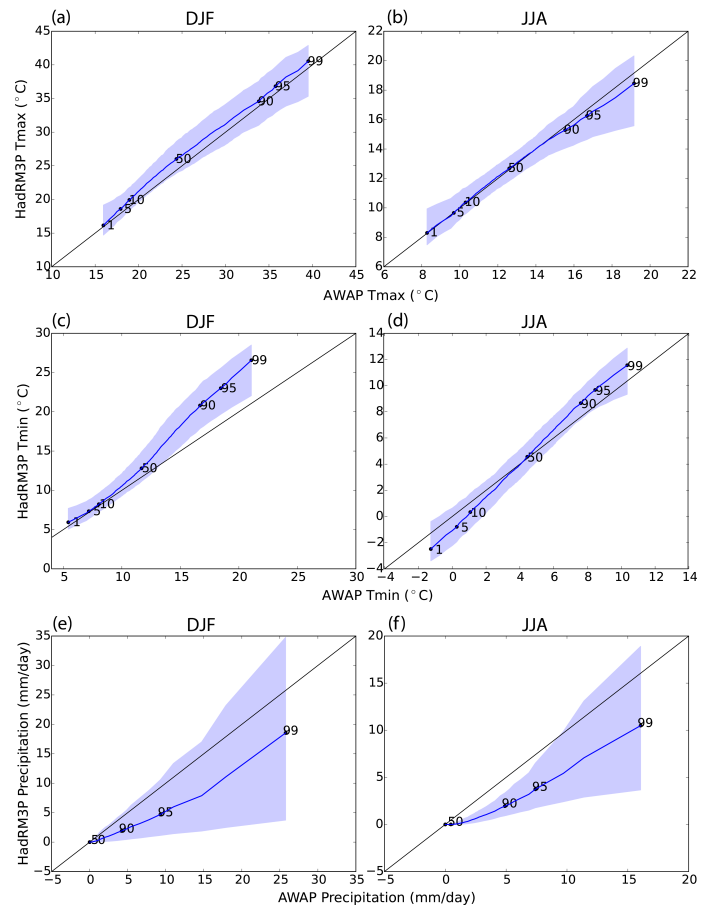

Figure S9: As in Figure S4, but for Melbourne.

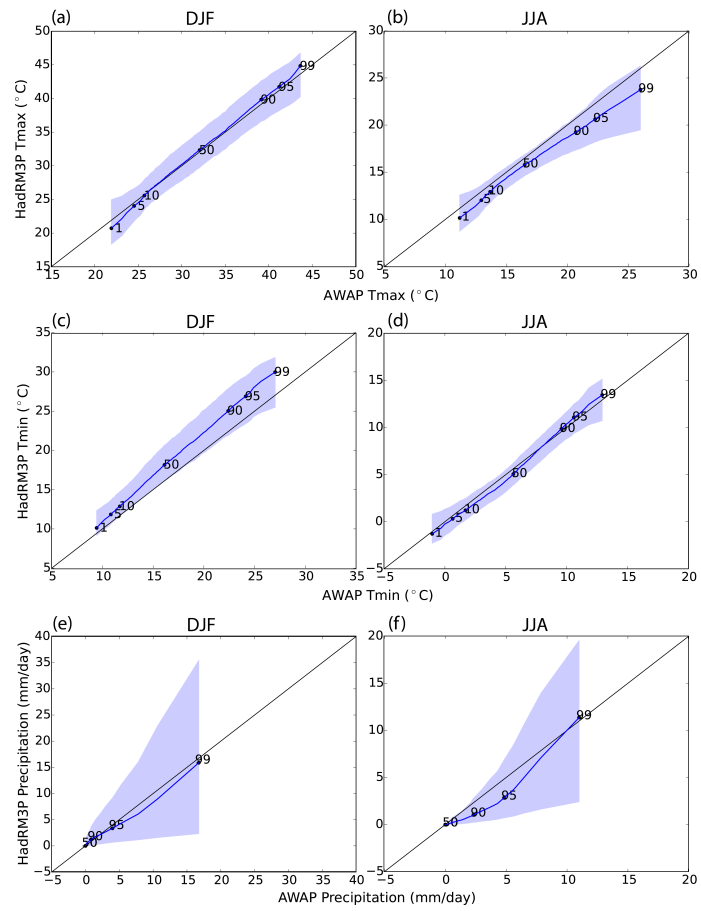

Figure S10: As in Figure S4, but for Mildura.

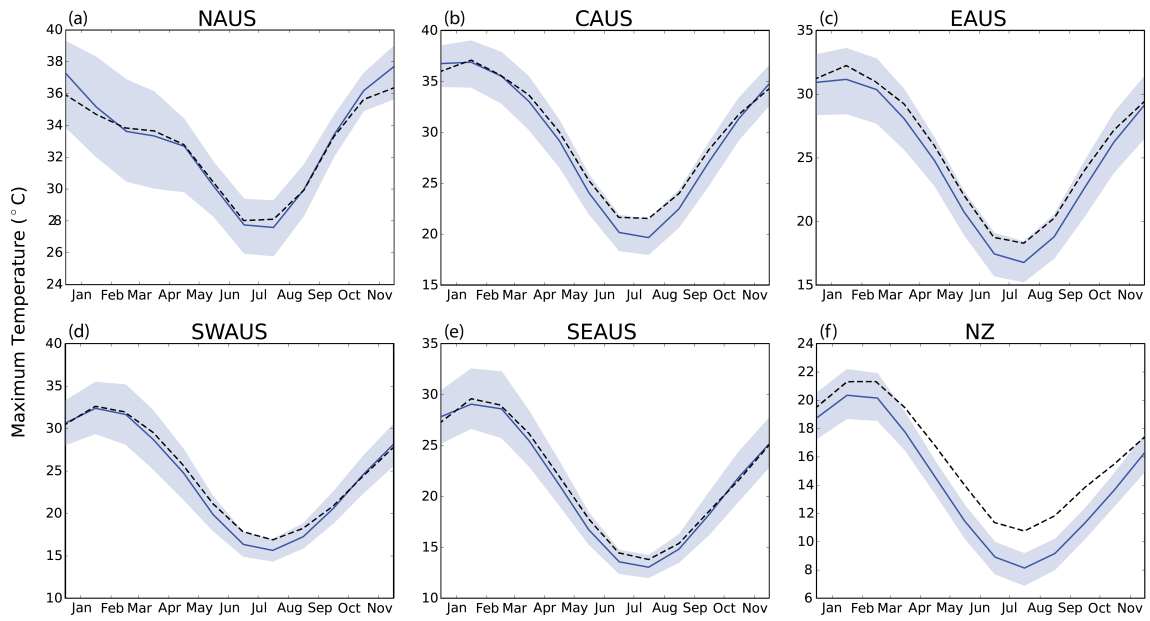

Figure S11: Time series of monthly average maximum temperature for the respective study regions (as labelled), calculated over the period 1986–2014. Values from weather@home simulations are shown by the solid line (5th–95th percentile shaded envelope) while the observations (AWAP over Australia and VCSN over New Zealand) are shown by the dashed line.

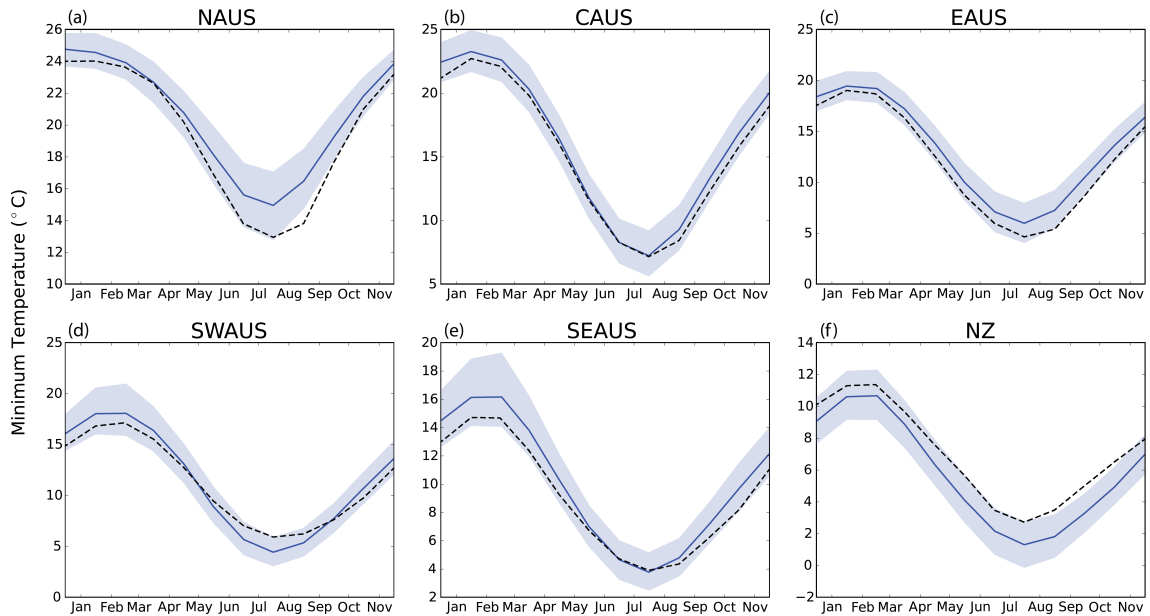

Figure S12: As in Figure S11, but showing average minimum temperature.

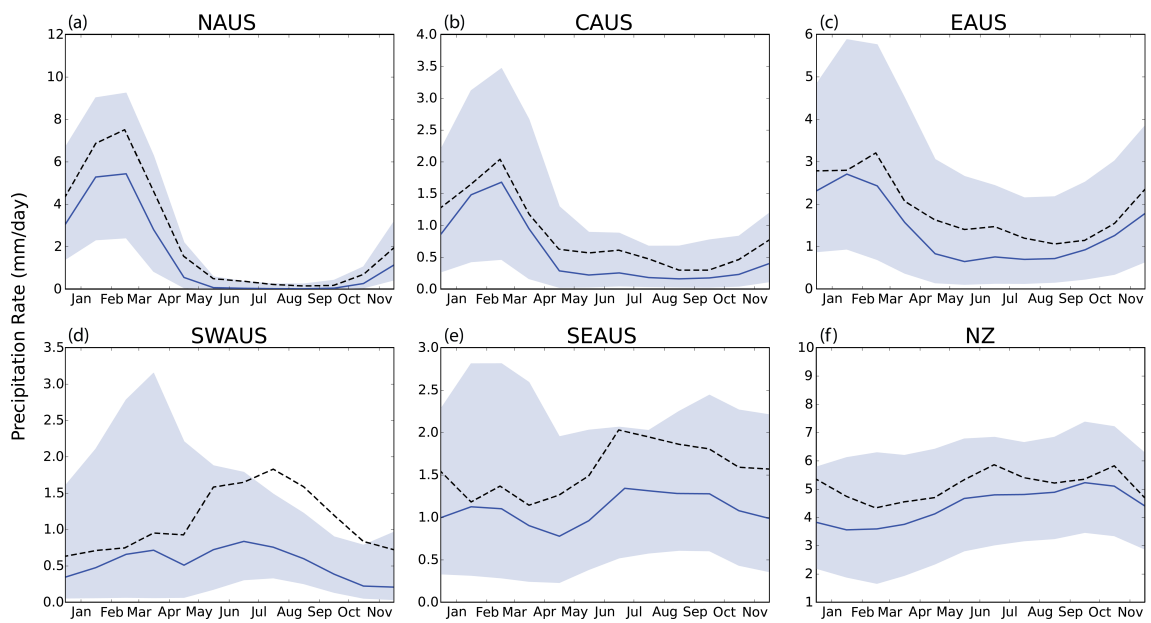

Figure S13: As in Figure S11, but showing average precipitation.
